# Supplementary material
Source: publisher figshare collection journal article supplement (https://gsapubs.figshare.com/articles/dataset/_/16674505)
Supplement: Supplementary file 1 [file 30872188]

Ao Su, Paul D. Bons, Honghan Chen, Yue-xing Feng, Jian-xin Zhao, and Jingwen Song, 2021, Age, material source, and formation mechanism of bedding-parallel calcite beef veins: Case from the mature Eocene lacustrine shales in the Biyang Sag, Nanxiang Basin, China: GSA Bulletin, <https://doi.org/10.1130/B35866.1>.

## Supplemental Material

**Figure S1.** Correlations of vein density vs. TOC, calcite and dolomite contents of host-shales.

**Figure S2.** The box plots of calcite contents in shale samples with and without beef veins.

**Table S1.** LA-MC-ICP-MS carbonate U-Pb dating data.

**Supplementary Fig.S1**

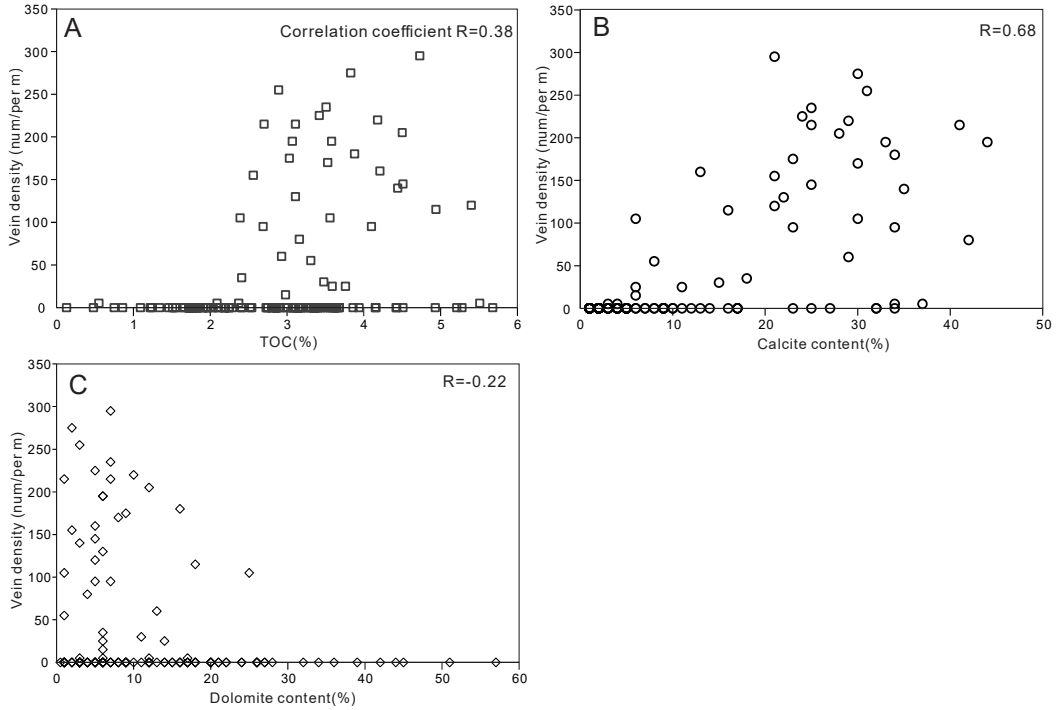

Fig.S1. Correlations of vein density vs. TOC, calcite and dolomite contents of host-shales.

**Supplementary Fig.S2**

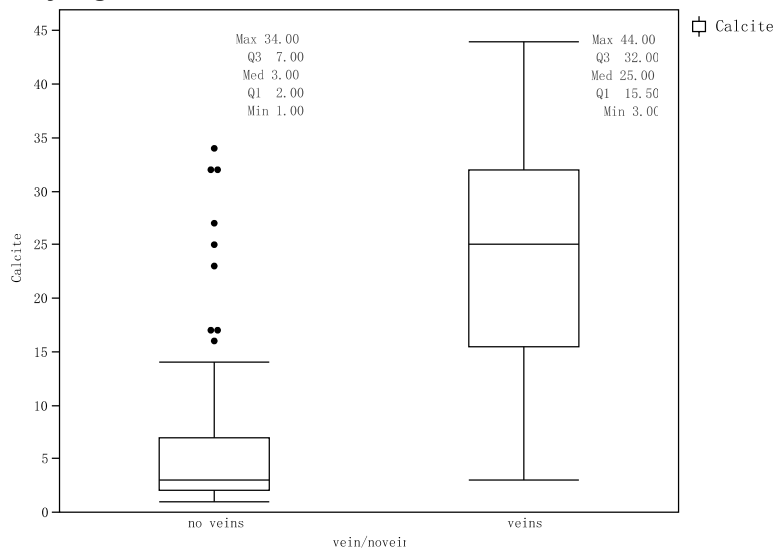

Fig.S2. The box plots of calcite contents in shale samples with and without beef veins

## Supplementary Table.S1

LA-MC-ICP-MS carbonate U-Pb dating data

| SAMPLE Spot No. | $^{238}\text{U}/^{206}\text{Pb}$ | 2s %  | $^{207}\text{Pb}/^{206}\text{Pb}$ | 2s % | Approx_U/ppm | Approx_Pb/ppm |
|-----------------|----------------------------------|-------|-----------------------------------|------|--------------|---------------|
| C2-L1-01        | 5.21                             | 5.74  | 0.84                              | 0.01 | 0.046        | 0.036         |
| C2-L1-02        | 7.40                             | 8.16  | 0.83                              | 0.01 | 0.041        | 0.022         |
| C2-L1-03        | 15.34                            | 16.92 | 0.79                              | 0.01 | 0.084        | 0.020         |
| C2-L1-04        | 6.37                             | 7.02  | 0.83                              | 0.01 | 0.051        | 0.034         |
| C2-L1-05        | 9.23                             | 10.18 | 0.81                              | 0.01 | 0.131        | 0.059         |
| C2-L1-06        | 13.59                            | 14.99 | 0.79                              | 0.01 | 0.062        | 0.017         |
| C2-L1-07        | 7.91                             | 8.73  | 0.82                              | 0.01 | 0.037        | 0.018         |
| C2-L1-08        | 9.14                             | 9.84  | 0.81                              | 0.01 | 0.058        | 0.024         |
| C2-L1-09        | 20.00                            | 22.06 | 0.75                              | 0.01 | 0.114        | 0.020         |
| C2-L1-10        | 7.55                             | 8.33  | 0.82                              | 0.01 | 0.040        | 0.020         |
| C2-L1-11        | 11.12                            | 12.27 | 0.80                              | 0.01 | 0.061        | 0.021         |
| C2-L1-12        | 8.93                             | 9.85  | 0.81                              | 0.01 | 0.052        | 0.021         |
| C2-L1-13        | 17.79                            | 19.62 | 0.76                              | 0.01 | 0.089        | 0.018         |
| C2-L1-14        | 8.43                             | 9.08  | 0.81                              | 0.01 | 0.051        | 0.023         |
| C2-L1-15        | 9.12                             | 10.05 | 0.81                              | 0.01 | 0.060        | 0.025         |
| C2-L1-16        | 9.75                             | 10.75 | 0.81                              | 0.01 | 0.049        | 0.019         |
| C2-L1-17        | 8.06                             | 8.89  | 0.82                              | 0.01 | 0.053        | 0.023         |
| C2-L1-18        | 8.59                             | 9.48  | 0.81                              | 0.01 | 0.061        | 0.027         |
| C2-L1-19        | 17.93                            | 19.78 | 0.76                              | 0.01 | 0.076        | 0.015         |
| C2-L1-20        | 9.83                             | 10.84 | 0.81                              | 0.01 | 0.056        | 0.022         |
| C2-L1-21        | 13.37                            | 14.74 | 0.79                              | 0.01 | 0.076        | 0.021         |
| C2-L1-22        | 6.77                             | 7.46  | 0.82                              | 0.01 | 0.037        | 0.021         |
| C2-L1-23        | 6.17                             | 6.81  | 0.83                              | 0.01 | 0.056        | 0.037         |
| C2-L1-24        | 17.09                            | 18.85 | 0.76                              | 0.02 | 0.099        | 0.022         |
| C2-L1-25        | 14.41                            | 15.89 | 0.78                              | 0.01 | 0.093        | 0.024         |
| C2-L1-26        | 13.33                            | 14.71 | 0.78                              | 0.02 | 0.061        | 0.017         |
| C2-L1-27        | 9.00                             | 9.93  | 0.81                              | 0.01 | 0.052        | 0.022         |
| C2-L1-28        | 17.99                            | 19.84 | 0.76                              | 0.01 | 0.093        | 0.018         |
| C2-L1-29        | 16.08                            | 17.73 | 0.77                              | 0.01 | 0.092        | 0.020         |
| C2-L1-30        | 10.75                            | 11.86 | 0.80                              | 0.01 | 0.063        | 0.023         |
| C2-L1-31        | 21.93                            | 24.19 | 0.73                              | 0.01 | 0.155        | 0.025         |
| C2-L1-32        | 8.25                             | 9.10  | 0.81                              | 0.01 | 0.039        | 0.018         |
| C2-L1-33        | 8.55                             | 9.43  | 0.81                              | 0.01 | 0.047        | 0.021         |
| C2-L1-34        | 6.06                             | 6.68  | 0.82                              | 0.01 | 0.079        | 0.050         |
| C2-L1-35        | 6.37                             | 7.02  | 0.82                              | 0.01 | 0.050        | 0.031         |
| C2-L1-36        | 6.17                             | 6.81  | 0.82                              | 0.01 | 0.040        | 0.025         |
| C2-L1-37        | 13.70                            | 15.11 | 0.78                              | 0.01 | 0.090        | 0.024         |
| C2-L1-38        | 13.79                            | 15.21 | 0.77                              | 0.01 | 0.101        | 0.029         |
| C2-L1-39        | 12.99                            | 14.32 | 0.78                              | 0.01 | 0.126        | 0.037         |
| C2-L1-40        | 4.95                             | 5.46  | 0.83                              | 0.01 | 0.063        | 0.054         |
| C2-L1-41        | 6.80                             | 7.50  | 0.82                              | 0.01 | 0.050        | 0.027         |
| C2-L1-42        | 13.73                            | 15.14 | 0.77                              | 0.01 | 0.059        | 0.016         |
| C2-L1-43        | 9.21                             | 10.16 | 0.80                              | 0.01 | 0.065        | 0.027         |
| C2-L1-44        | 13.53                            | 14.92 | 0.77                              | 0.01 | 0.068        | 0.019         |
| C2-L3-01        | 44.17                            | 2.63  | 0.61                              | 0.02 | 0.121        | 0.001         |

|          |       |      |      |      |       |       |
|----------|-------|------|------|------|-------|-------|
| C2-L3-02 | 43.48 | 4.08 | 0.61 | 0.03 | 0.163 | 0.002 |
| C2-L3-03 | 39.33 | 1.95 | 0.64 | 0.01 | 0.085 | 0.001 |
| C2-L3-04 | 55.23 | 1.75 | 0.56 | 0.02 | 0.069 | 0.000 |
| C2-L3-05 | 56.44 | 1.40 | 0.55 | 0.01 | 0.127 | 0.000 |
| C2-L3-06 | 44.01 | 1.17 | 0.62 | 0.01 | 0.128 | 0.000 |
| C2-L3-07 | 37.86 | 1.80 | 0.65 | 0.01 | 0.091 | 0.001 |
| C2-L3-08 | 59.26 | 1.77 | 0.54 | 0.01 | 0.185 | 0.000 |
| C2-L3-09 | 40.32 | 1.90 | 0.64 | 0.02 | 0.071 | 0.000 |
| C2-L3-10 | 45.61 | 2.99 | 0.61 | 0.02 | 0.159 | 0.001 |
| C2-L3-11 | 47.16 | 3.40 | 0.60 | 0.02 | 0.181 | 0.001 |
| C2-L3-12 | 28.68 | 3.40 | 0.70 | 0.02 | 0.257 | 0.004 |
| C2-L3-13 | 39.89 | 3.29 | 0.64 | 0.02 | 0.142 | 0.001 |
| C2-L3-14 | 54.11 | 2.29 | 0.57 | 0.01 | 0.147 | 0.001 |
| C2-L3-15 | 45.99 | 2.09 | 0.61 | 0.01 | 0.092 | 0.001 |
| C2-L3-16 | 33.22 | 3.17 | 0.67 | 0.02 | 0.230 | 0.004 |
| C2-L3-17 | 38.91 | 1.27 | 0.65 | 0.01 | 0.103 | 0.000 |
| C2-L3-18 | 44.77 | 1.69 | 0.62 | 0.01 | 0.093 | 0.000 |
| C2-L3-19 | 59.29 | 2.81 | 0.55 | 0.01 | 0.170 | 0.001 |
| C2-L3-20 | 50.89 | 1.14 | 0.59 | 0.01 | 0.114 | 0.000 |
| C2-L3-21 | 60.13 | 2.50 | 0.54 | 0.01 | 0.138 | 0.000 |
| C2-L3-22 | 36.85 | 2.68 | 0.66 | 0.02 | 0.049 | 0.000 |
| C2-L3-23 | 42.64 | 3.43 | 0.63 | 0.01 | 0.142 | 0.001 |
| C2-L3-24 | 48.60 | 3.40 | 0.60 | 0.03 | 0.044 | 0.000 |
| C2-L3-25 | 46.18 | 2.11 | 0.61 | 0.01 | 0.110 | 0.001 |
| C2-L3-26 | 40.77 | 2.09 | 0.64 | 0.02 | 0.106 | 0.001 |
| C2-L3-27 | 41.84 | 3.30 | 0.64 | 0.02 | 0.211 | 0.002 |
| C2-L3-28 | 53.30 | 2.55 | 0.58 | 0.02 | 0.178 | 0.001 |
| C2-L3-29 | 59.55 | 3.09 | 0.55 | 0.02 | 0.220 | 0.001 |
| C2-L3-30 | 47.56 | 3.66 | 0.61 | 0.02 | 0.171 | 0.001 |
| C2-L3-31 | 50.57 | 1.42 | 0.60 | 0.02 | 0.112 | 0.000 |
| C2-L3-32 | 46.14 | 1.80 | 0.62 | 0.02 | 0.069 | 0.000 |
| C2-L3-33 | 35.44 | 2.71 | 0.67 | 0.02 | 0.062 | 0.001 |
| C2-L3-34 | 27.75 | 2.01 | 0.71 | 0.01 | 0.126 | 0.002 |
| C2-L3-35 | 47.97 | 1.51 | 0.61 | 0.01 | 0.062 | 0.000 |
| C2-L3-36 | 43.31 | 2.53 | 0.64 | 0.02 | 0.065 | 0.001 |
| C2-L3-37 | 35.90 | 1.85 | 0.67 | 0.01 | 0.095 | 0.001 |
| C2-L3-38 | 35.33 | 1.79 | 0.67 | 0.01 | 0.106 | 0.001 |
| C2-L3-39 | 48.39 | 2.52 | 0.61 | 0.02 | 0.043 | 0.000 |
| C2-L3-40 | 38.91 | 1.63 | 0.66 | 0.02 | 0.057 | 0.000 |
| C2-L3-41 | 55.65 | 3.06 | 0.59 | 0.02 | 0.129 | 0.001 |
| C2-L3-42 | 44.34 | 1.94 | 0.64 | 0.02 | 0.101 | 0.001 |
| C2-L3-43 | 41.73 | 1.52 | 0.65 | 0.01 | 0.109 | 0.000 |
| C2-L3-44 | 44.17 | 4.21 | 0.64 | 0.03 | 0.052 | 0.000 |
| C2-L3-45 | 39.89 | 3.29 | 0.66 | 0.02 | 0.078 | 0.001 |
| C2-L3-46 | 37.70 | 1.24 | 0.67 | 0.01 | 0.078 | 0.000 |
| C2-L3-47 | 41.18 | 1.68 | 0.66 | 0.01 | 0.092 | 0.000 |
| C2-L3-48 | 37.51 | 1.14 | 0.68 | 0.01 | 0.073 | 0.000 |
| C2-L3-49 | 18.74 | 1.92 | 0.76 | 0.02 | 0.042 | 0.002 |
| C2-L3-50 | 18.46 | 2.27 | 0.76 | 0.01 | 0.129 | 0.004 |

|          |       |      |      |      |       |       |
|----------|-------|------|------|------|-------|-------|
| C2-L3-51 | 4.12  | 0.92 | 0.82 | 0.01 | 0.094 | 0.027 |
| C2-L3-52 | 0.66  | 0.09 | 0.85 | 0.00 | 0.156 | 0.130 |
| C2-L5-01 | 14.24 | 0.90 | 0.79 | 0.01 | 0.063 | 0.018 |
| C2-L5-02 | 14.64 | 0.88 | 0.78 | 0.01 | 0.109 | 0.030 |
| C2-L5-03 | 14.66 | 1.24 | 0.78 | 0.01 | 0.100 | 0.028 |
| C2-L5-04 | 15.18 | 0.84 | 0.78 | 0.01 | 0.100 | 0.026 |
| C2-L5-05 | 21.23 | 1.42 | 0.75 | 0.01 | 0.127 | 0.023 |
| C2-L5-06 | 15.90 | 1.06 | 0.78 | 0.01 | 0.121 | 0.029 |
| C2-L5-07 | 18.34 | 1.09 | 0.76 | 0.01 | 0.163 | 0.035 |
| C2-L5-08 | 9.25  | 0.68 | 0.81 | 0.01 | 0.091 | 0.040 |
| C2-L5-09 | 23.35 | 1.27 | 0.74 | 0.01 | 0.121 | 0.019 |
| C2-L5-10 | 13.54 | 0.77 | 0.79 | 0.01 | 0.091 | 0.026 |
| C2-L5-11 | 23.30 | 0.81 | 0.74 | 0.01 | 0.125 | 0.020 |
| C2-L5-12 | 22.40 | 0.56 | 0.74 | 0.01 | 0.120 | 0.020 |
| C2-L5-13 | 26.85 | 0.66 | 0.72 | 0.01 | 0.119 | 0.016 |
| C2-L5-14 | 20.74 | 0.56 | 0.75 | 0.01 | 0.105 | 0.019 |
| C2-L5-15 | 22.33 | 1.34 | 0.74 | 0.01 | 0.119 | 0.020 |
| C2-L5-16 | 7.37  | 1.06 | 0.81 | 0.01 | 0.131 | 0.074 |
| C2-L5-17 | 16.09 | 0.55 | 0.77 | 0.01 | 0.100 | 0.025 |
| C2-L5-18 | 18.75 | 0.91 | 0.76 | 0.01 | 0.106 | 0.022 |
| C2-L5-19 | 11.91 | 0.72 | 0.79 | 0.01 | 0.087 | 0.030 |
| C2-L5-20 | 25.03 | 1.16 | 0.72 | 0.01 | 0.143 | 0.021 |
| C2-L5-21 | 22.90 | 0.97 | 0.73 | 0.01 | 0.149 | 0.024 |
| C2-L5-22 | 18.69 | 1.23 | 0.76 | 0.01 | 0.093 | 0.019 |
| C2-L5-23 | 27.02 | 0.66 | 0.71 | 0.01 | 0.126 | 0.017 |
| C2-L5-24 | 21.02 | 0.70 | 0.74 | 0.01 | 0.121 | 0.021 |
| C2-L5-25 | 7.37  | 0.76 | 0.81 | 0.01 | 0.101 | 0.062 |
| C2-L5-26 | 13.34 | 1.19 | 0.78 | 0.01 | 0.091 | 0.027 |
| C2-L5-27 | 25.39 | 1.32 | 0.72 | 0.01 | 0.174 | 0.025 |
| C2-L5-28 | 15.55 | 1.42 | 0.77 | 0.01 | 0.085 | 0.022 |
| C2-L5-29 | 17.39 | 0.87 | 0.76 | 0.01 | 0.096 | 0.021 |
| C2-L5-30 | 31.11 | 1.08 | 0.69 | 0.01 | 0.175 | 0.020 |
| C2-L5-31 | 14.35 | 1.28 | 0.77 | 0.01 | 0.085 | 0.024 |
| C2-L5-32 | 13.54 | 0.83 | 0.78 | 0.01 | 0.084 | 0.026 |
| C2-L5-33 | 13.91 | 0.70 | 0.78 | 0.01 | 0.066 | 0.019 |
| C2-L5-34 | 18.27 | 1.27 | 0.75 | 0.01 | 0.103 | 0.022 |
| C2-L5-35 | 13.40 | 1.15 | 0.78 | 0.01 | 0.109 | 0.034 |
| C2-L5-36 | 12.60 | 0.94 | 0.78 | 0.01 | 0.071 | 0.022 |
| C2-L5-37 | 25.27 | 1.25 | 0.71 | 0.01 | 0.136 | 0.019 |
| C2-L5-38 | 21.53 | 0.95 | 0.73 | 0.01 | 0.129 | 0.022 |
| C2-L7-01 | 6.47  | 0.30 | 0.83 | 0.01 | 0.183 | 0.116 |
| C2-L7-02 | 4.54  | 0.09 | 0.84 | 0.01 | 0.153 | 0.143 |
| C2-L7-03 | 12.24 | 0.29 | 0.80 | 0.01 | 0.375 | 0.122 |
| C2-L7-04 | 4.36  | 0.11 | 0.84 | 0.01 | 0.107 | 0.104 |
| C2-L7-05 | 3.04  | 0.09 | 0.84 | 0.01 | 0.069 | 0.096 |
| C2-L7-06 | 3.23  | 0.26 | 0.84 | 0.01 | 0.109 | 0.139 |
| C2-L7-07 | 5.03  | 0.24 | 0.83 | 0.01 | 0.165 | 0.136 |
| C2-L7-08 | 8.16  | 0.16 | 0.82 | 0.01 | 0.220 | 0.111 |
| C2-L7-09 | 11.67 | 0.28 | 0.80 | 0.01 | 0.351 | 0.120 |

|           |       |      |      |      |       |       |
|-----------|-------|------|------|------|-------|-------|
| C2-L7-10  | 5.70  | 0.17 | 0.83 | 0.01 | 0.131 | 0.096 |
| C2-L7-11  | 7.29  | 0.14 | 0.82 | 0.01 | 0.227 | 0.128 |
| C2-L7-12  | 12.23 | 0.38 | 0.80 | 0.01 | 0.421 | 0.135 |
| C2-L7-13  | 8.73  | 0.18 | 0.81 | 0.01 | 0.297 | 0.139 |
| C2-L7-14  | 14.44 | 0.25 | 0.78 | 0.01 | 0.453 | 0.125 |
| C2-L7-15  | 12.37 | 0.26 | 0.79 | 0.01 | 0.301 | 0.099 |
| C2-L7-16  | 8.00  | 0.28 | 0.82 | 0.01 | 0.279 | 0.143 |
| C2-L7-17  | 7.89  | 0.17 | 0.82 | 0.01 | 0.214 | 0.110 |
| C2-L7-18  | 12.62 | 0.28 | 0.79 | 0.01 | 0.343 | 0.108 |
| C2-L7-19  | 11.85 | 0.40 | 0.80 | 0.01 | 0.286 | 0.095 |
| C2-L7-20  | 10.86 | 0.25 | 0.80 | 0.01 | 0.286 | 0.107 |
| C2-L7-21  | 12.52 | 0.26 | 0.79 | 0.01 | 0.337 | 0.107 |
| C2-L7-22  | 7.83  | 0.22 | 0.82 | 0.01 | 0.204 | 0.107 |
| C2-L7-23  | 8.65  | 0.21 | 0.81 | 0.01 | 0.271 | 0.129 |
| C2-L7-24  | 5.99  | 0.25 | 0.83 | 0.01 | 0.186 | 0.129 |
| C2-L7-25  | 12.47 | 0.59 | 0.79 | 0.01 | 0.459 | 0.148 |
| C2-L7-26  | 3.75  | 0.11 | 0.84 | 0.01 | 0.096 | 0.106 |
| C2-L7-27  | 13.42 | 0.27 | 0.79 | 0.01 | 0.403 | 0.120 |
| C2-L7-28  | 11.92 | 0.32 | 0.79 | 0.01 | 0.439 | 0.148 |
| C2-L7-29  | 12.41 | 0.66 | 0.79 | 0.01 | 0.436 | 0.141 |
| C2-L7-30  | 7.39  | 0.24 | 0.82 | 0.01 | 0.229 | 0.128 |
| C2-L7-31  | 4.48  | 0.26 | 0.83 | 0.01 | 0.155 | 0.149 |
| C2-L7-32  | 2.12  | 0.06 | 0.85 | 0.01 | 0.062 | 0.126 |
| C2-L7-33  | 7.95  | 0.20 | 0.81 | 0.01 | 0.215 | 0.113 |
| C2-L7-34  | 7.52  | 0.18 | 0.82 | 0.01 | 0.184 | 0.101 |
| C2-L7-35  | 8.81  | 0.24 | 0.81 | 0.01 | 0.304 | 0.140 |
| C2-L7-36  | 10.20 | 0.38 | 0.80 | 0.01 | 0.397 | 0.160 |
| C2-L7-37  | 4.76  | 0.21 | 0.83 | 0.01 | 0.138 | 0.129 |
| C2-L7-38  | 13.06 | 0.30 | 0.78 | 0.01 | 0.352 | 0.108 |
| C2-L7-39  | 3.02  | 0.08 | 0.84 | 0.01 | 0.074 | 0.104 |
| C2-L7-40  | 3.41  | 0.25 | 0.84 | 0.01 | 0.108 | 0.130 |
| C2-L7-41  | 5.13  | 0.37 | 0.83 | 0.01 | 0.169 | 0.135 |
| C2-L7-42  | 6.30  | 0.31 | 0.82 | 0.01 | 0.192 | 0.127 |
| C2-L7-43  | 9.97  | 1.02 | 0.80 | 0.01 | 0.512 | 0.194 |
| C2-L7-44  | 4.41  | 0.12 | 0.83 | 0.01 | 0.113 | 0.107 |
| C2-L7-45  | 6.83  | 0.29 | 0.82 | 0.01 | 0.200 | 0.113 |
| C2-L7-46  | 2.68  | 0.07 | 0.84 | 0.01 | 0.070 | 0.108 |
| C2-L7-47  | 5.25  | 0.46 | 0.82 | 0.01 | 0.411 | 0.327 |
| C2-L7-48  | 8.09  | 1.10 | 0.81 | 0.01 | 0.317 | 0.158 |
| <hr/>     |       |      |      |      |       |       |
| C2-L10-01 | 1.16  | 0.24 | 0.85 | 0.00 | 0.287 | 1.040 |
| C2-L10-02 | 2.89  | 0.47 | 0.84 | 0.01 | 0.222 | 0.337 |
| C2-L10-03 | 8.48  | 1.37 | 0.82 | 0.02 | 0.020 | 0.010 |
| C2-L10-04 | 5.63  | 1.06 | 0.83 | 0.01 | 0.151 | 0.119 |
| C2-L10-05 | 10.62 | 0.54 | 0.81 | 0.01 | 0.068 | 0.027 |
| C2-L10-06 | 4.33  | 0.54 | 0.83 | 0.01 | 0.162 | 0.183 |
| C2-L10-07 | 14.78 | 0.40 | 0.79 | 0.01 | 0.114 | 0.032 |
| C2-L10-08 | 16.54 | 0.55 | 0.78 | 0.01 | 0.140 | 0.035 |
| C2-L10-09 | 11.55 | 0.96 | 0.80 | 0.01 | 0.107 | 0.038 |
| C2-L10-10 | 7.02  | 0.94 | 0.82 | 0.01 | 0.145 | 0.093 |

|           |       |      |      |      |       |       |
|-----------|-------|------|------|------|-------|-------|
| C2-L10-11 | 20.73 | 0.55 | 0.75 | 0.01 | 0.090 | 0.017 |
| C2-L10-12 | 16.81 | 0.90 | 0.77 | 0.01 | 0.099 | 0.023 |
| C2-L10-13 | 5.77  | 0.67 | 0.82 | 0.01 | 0.110 | 0.083 |
| C2-L10-14 | 23.92 | 1.30 | 0.74 | 0.01 | 0.165 | 0.027 |
| C2-L10-15 | 22.42 | 0.87 | 0.75 | 0.01 | 0.086 | 0.015 |
| C2-L10-16 | 17.51 | 2.20 | 0.77 | 0.03 | 0.031 | 0.007 |
| C2-L10-17 | 19.25 | 0.74 | 0.76 | 0.01 | 0.132 | 0.027 |
| C2-L10-18 | 10.60 | 1.43 | 0.80 | 0.01 | 0.163 | 0.067 |
| C2-L10-19 | 14.53 | 1.09 | 0.78 | 0.01 | 0.100 | 0.029 |
| C2-L10-20 | 12.82 | 1.64 | 0.79 | 0.01 | 0.223 | 0.072 |
| C2-L10-21 | 16.49 | 1.31 | 0.77 | 0.01 | 0.153 | 0.038 |
| C2-L10-22 | 17.29 | 1.27 | 0.76 | 0.01 | 0.157 | 0.037 |
| C2-L10-23 | 16.84 | 1.95 | 0.77 | 0.01 | 0.108 | 0.026 |
| C2-L10-24 | 3.98  | 0.63 | 0.83 | 0.01 | 0.345 | 0.390 |
| C2-L10-25 | 18.82 | 1.41 | 0.76 | 0.01 | 0.179 | 0.036 |
| C2-L10-26 | 13.50 | 1.49 | 0.78 | 0.01 | 0.166 | 0.051 |
| C2-L10-27 | 16.79 | 1.76 | 0.77 | 0.01 | 0.138 | 0.037 |
| C2-L10-28 | 27.37 | 1.15 | 0.71 | 0.01 | 0.141 | 0.020 |
| C2-L10-29 | 7.30  | 1.16 | 0.81 | 0.01 | 0.114 | 0.064 |
| C2-L10-30 | 13.96 | 4.06 | 0.78 | 0.03 | 0.018 | 0.007 |
| C2-L10-31 | 16.86 | 1.60 | 0.76 | 0.01 | 0.111 | 0.029 |
| C2-L10-32 | 9.85  | 0.97 | 0.80 | 0.01 | 0.122 | 0.061 |
| C2-L10-33 | 16.34 | 1.38 | 0.77 | 0.01 | 0.171 | 0.044 |
| C2-L10-34 | 18.35 | 2.96 | 0.75 | 0.01 | 0.109 | 0.029 |
| C2-L10-35 | 23.32 | 0.94 | 0.73 | 0.01 | 0.096 | 0.016 |
| C2-L10-36 | 21.93 | 0.61 | 0.74 | 0.01 | 0.070 | 0.012 |
| C2-L10-37 | 22.83 | 1.09 | 0.73 | 0.01 | 0.099 | 0.017 |
| C2-L10-38 | 10.83 | 0.94 | 0.79 | 0.01 | 0.170 | 0.066 |
| C2-L10-39 | 25.18 | 1.78 | 0.72 | 0.01 | 0.148 | 0.022 |
| C2-L10-40 | 6.68  | 1.50 | 0.81 | 0.01 | 0.142 | 0.097 |
| C2-L10-41 | 14.32 | 2.05 | 0.77 | 0.01 | 0.089 | 0.026 |
| C2-L10-42 | 11.49 | 2.15 | 0.79 | 0.01 | 0.099 | 0.037 |
| C2-L10-43 | 14.18 | 1.62 | 0.77 | 0.01 | 0.084 | 0.024 |
| C2-L10-44 | 17.26 | 1.11 | 0.75 | 0.02 | 0.090 | 0.022 |
| C2-L10-45 | 14.14 | 1.76 | 0.77 | 0.01 | 0.174 | 0.049 |

---
